# Supplementary material for: Regulation of integrin α5β1 conformational states and intrinsic affinities by metal ions and the ADMIDAS
Source: PubMed Central journal article supplement — Mol Biol Cell. 2022 May 12;33(6):ar56. doi: 10.1091/mbc.E21-11-0536 (PMC9265148; doi:10.1091/mbc.e21-11-0536), 2022-05-12
Supplement: mbc-33-ar56-s001.pdf [file mbc-33-ar56-s001.pdf]

# Supplementary Materials

*Molecular Biology of the Cell*

Anderson *et al.*

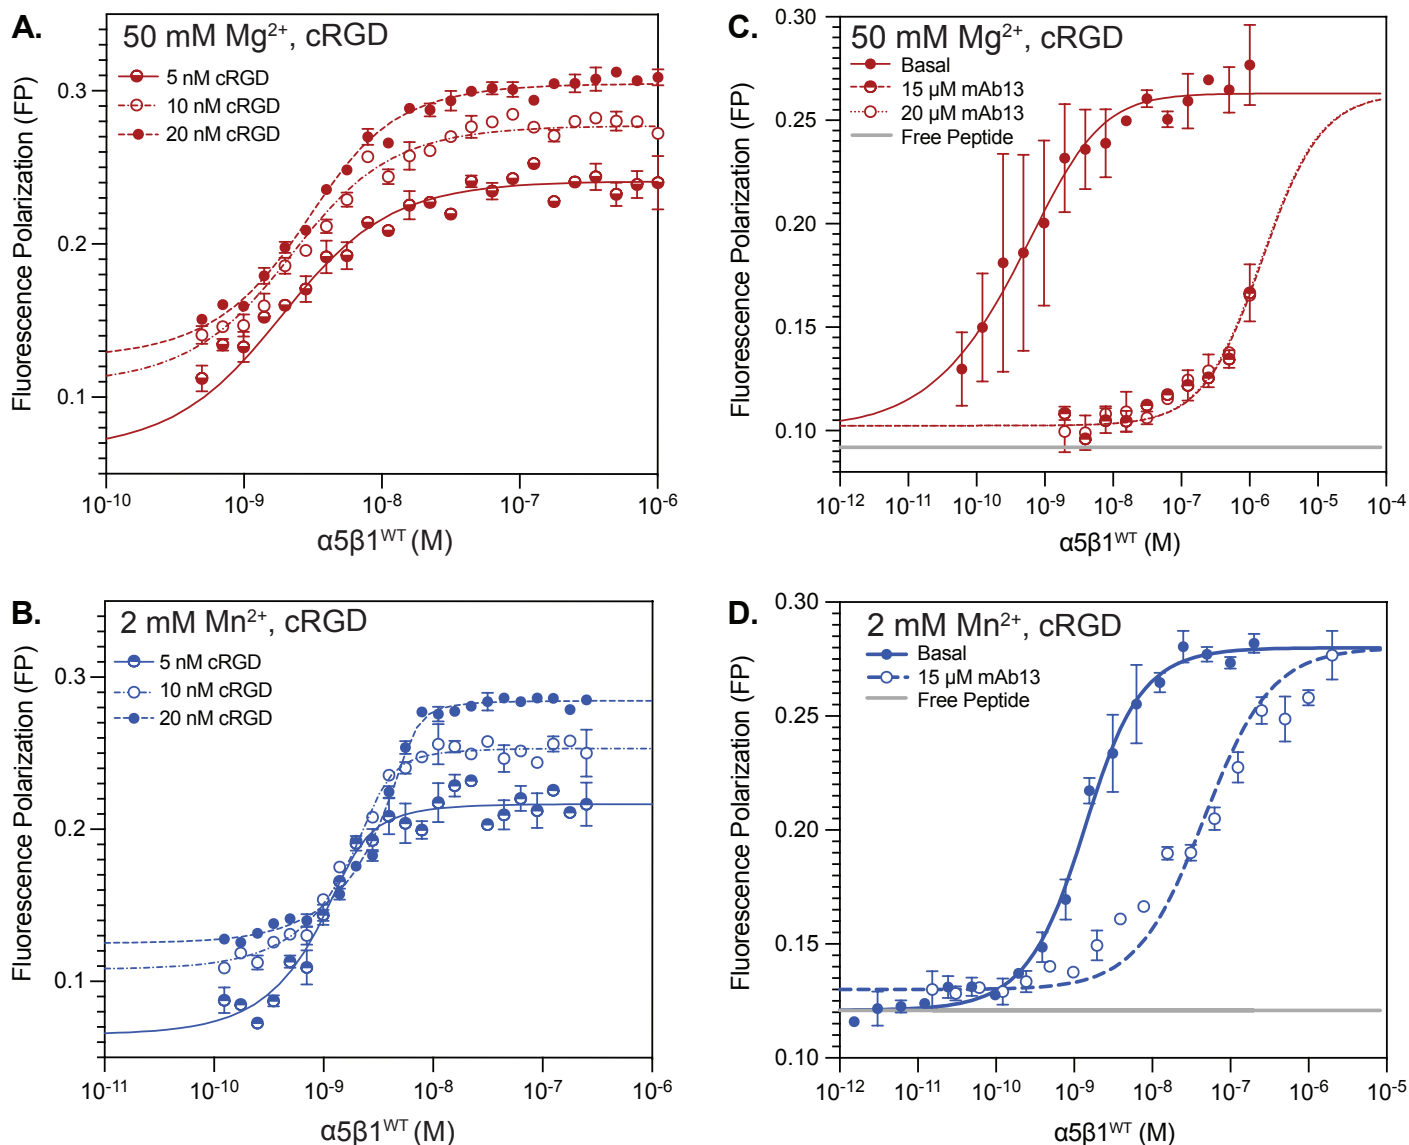

**Figure S1. Affinities of  $\alpha 5\beta 1^{WT}$  for FITC-cRGD.** (A-B)  $\alpha 5\beta 1^{WT}$  was titrated in the presence of FITC-cRGD peptide at three concentrations in (A) 50 mM Mg<sup>2+</sup> (red) and (B) 2 mM Mn<sup>2+</sup> (blue). Multiple concentrations of ligand are used to compensate for ligand depletion effects at affinities >1 nM by globally fitting  $K_d$  values. (C-D) The closed ensemble (EC+BC) of  $\alpha 5\beta 1^{WT}$  for ligand FITC-cRGD in (C) 50 mM Mg<sup>2+</sup> and (D) 2 mM Mn<sup>2+</sup> was measured by titrating  $\alpha 5\beta 1^{WT}$  in absence (basal, solid line) and presence of mAb13 fab (15 and 20  $\mu$ M, dashed and dotted respectively), with 10 nM FITC-cRGD peptide. All titrations contain pH 7.4 TBS. Titrations were done in triplicate and fitted affinities are shown in Table 1.

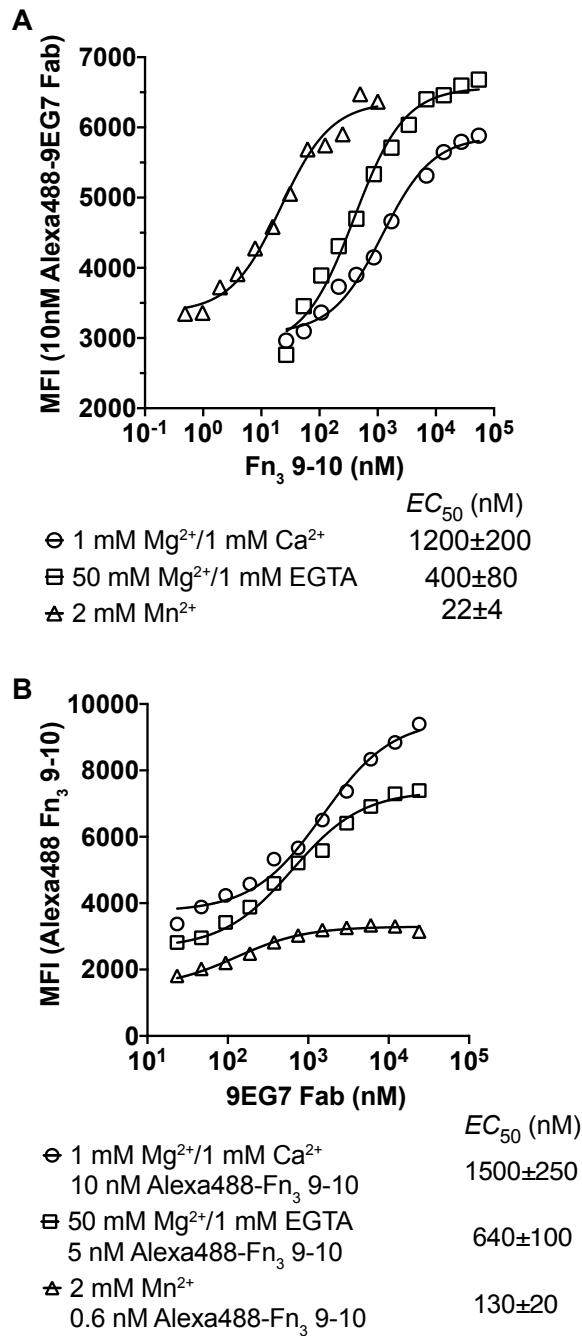

**Figure S2. Titrations of intact  $\alpha 5\beta 1^{\text{WT}}$  on K562 cells with  $\text{Fn}_3$  9-10 and Fab 9EG7.** Concentrations necessary to saturate intact  $\alpha 5\beta 1$  on K562 cells with  $\text{Fn}_3$  9-10 and Fab 9EG7, for use in determining the conformational landscape of cell-bound  $\alpha 5\beta 1$  in the conditions of 1 mM  $\text{Mg}^{2+}$ /1 mM  $\text{Ca}^{2+}$ , 50 mM  $\text{Mg}^{2+}$ /1 mM EGTA, and 2 mM  $\text{Mn}^{2+}$ . (A and B) Alexa488-9EG7 Fab (10 nM) (A) or Alexa488- $\text{Fn}_3$  9-10 (10, 5, or 0.6 nM as indicated) (B) binding to K562 cells ( $2 \times 10^6$  cells/ml) was measured by FACS, without washing, in presence of unlabeled  $\text{Fn}_3$  9-10 (A) or 9EG7 Fab (B).

### A. Calcium Titration of $\alpha 5\beta 1^{WT}$ with $Mn^{2+}$ and $Mg^{2+}$

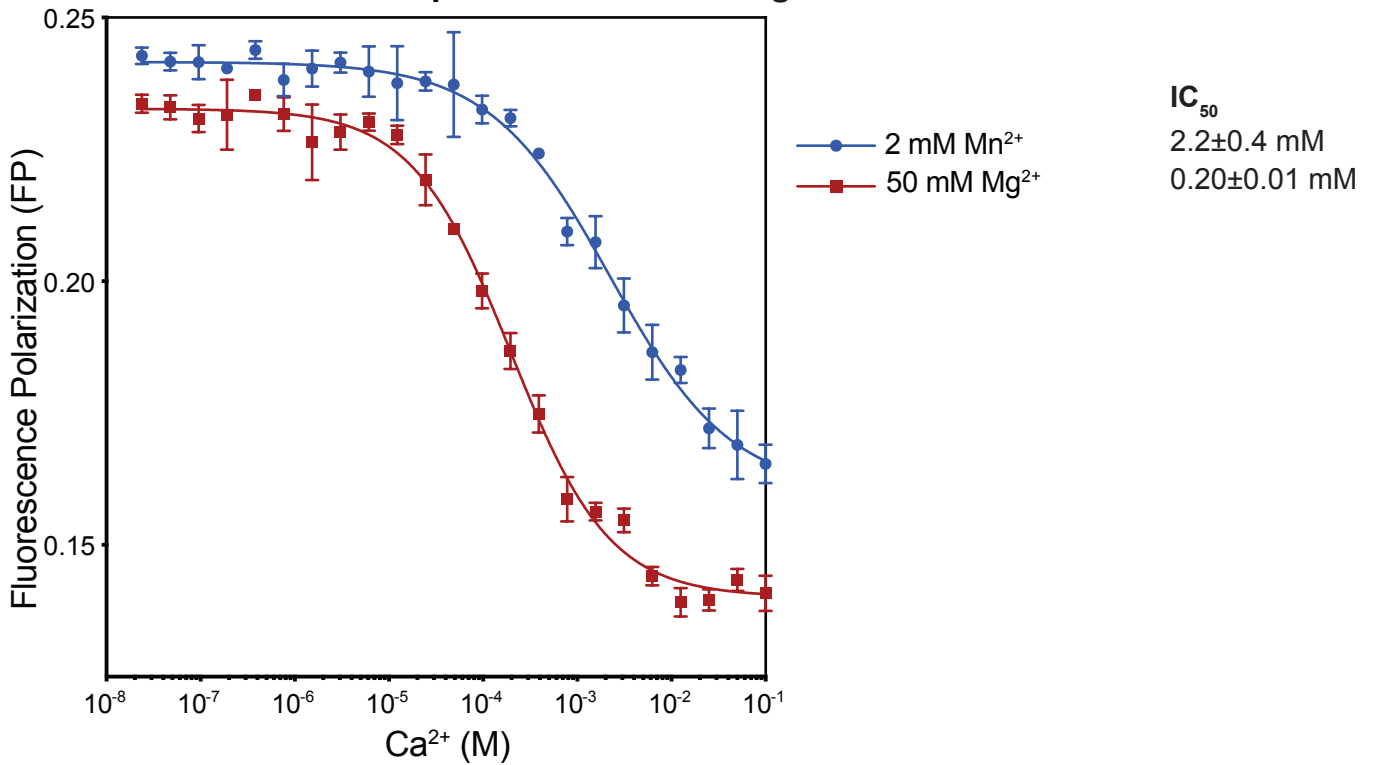

### B. Metal Ion Titration of WT vs Mutant

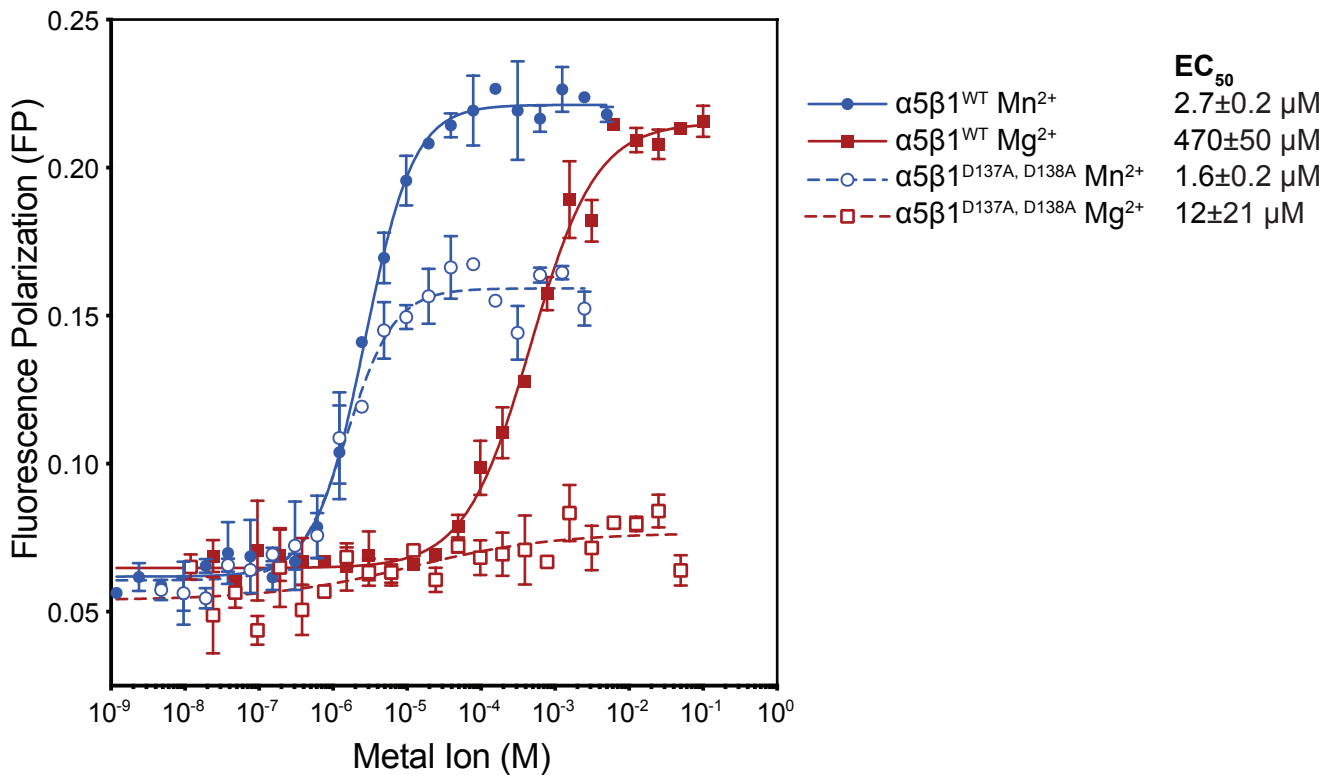

**Figure S3. Metal Ion titrations of  $\alpha 5\beta 1$ .** (A) Inhibition by calcium of binding of  $\alpha 5\beta 1^{WT}$  (20 nM) to FITC-cRGD (5 nM) in 2 mM Mn<sup>2+</sup> (blue) or 50 mM Mg<sup>2+</sup> (red). (B)  $\alpha 5\beta 1^{D137A, D138A}$  shows a reduced FP signal during titration with Mn<sup>2+</sup> and Mg<sup>2+</sup> compared to  $\alpha 5\beta 1^{WT}$ , because of the lower affinity  $\alpha 5\beta 1^{D137A, D138A}$  has for FITC-cRGD.  $\alpha 5\beta 1^{WT}$  (solid lines, 20 nM) and  $\alpha 5\beta 1^{D137A, D138A}$  (dashed lines, 20 nM) were titrated with Mn<sup>2+</sup> (blue) or Mg<sup>2+</sup> (red) in the presence of FITC-cRGD (5 nM). This experiment also shows that 2 mM Mn<sup>2+</sup> is saturating for both  $\alpha 5\beta 1^{WT}$  and  $\alpha 5\beta 1^{D137A, D138A}$ . Titrations were done in triplicate.

## Ca<sup>2+</sup> Titration of $\alpha 5\beta 1^{WT}$ and $\alpha 5\beta 1^{D137A, D138A}$

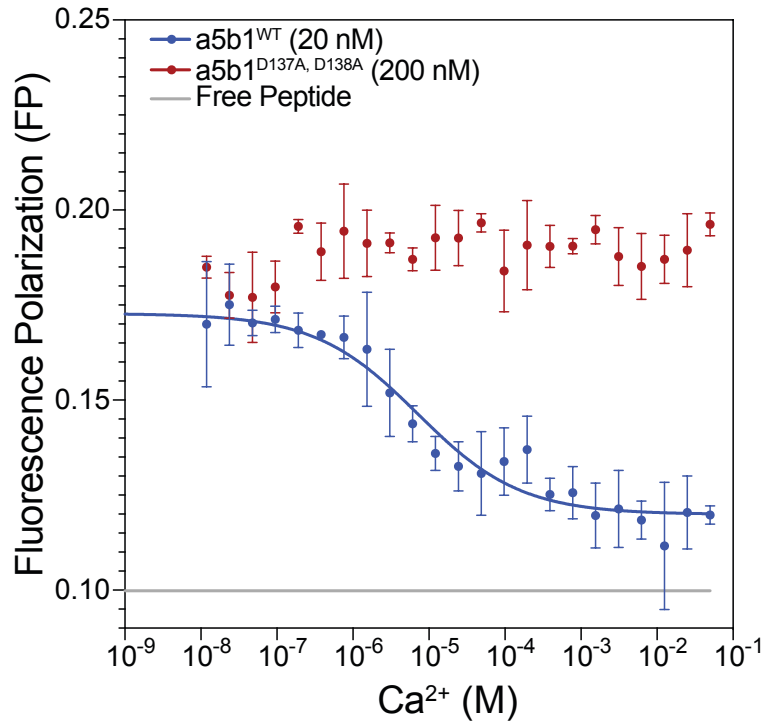

**Figure S4. Calcium ion titrations of  $\alpha 5\beta 1^{WT}$  and  $\alpha 5\beta 1^{D137A, D138A}$  in 1 mM Mg<sup>2+</sup>.** Similar to Fig. 6,  $\alpha 5\beta 1^{WT}$  and  $\alpha 5\beta 1^{D137A, D138A}$  were titrated with Ca<sup>2+</sup>, in the presence of 1 mM Mg<sup>2+</sup>. It was found that while binding of  $\alpha 5\beta 1^{WT}$  to FITC-cRGD (5 nM) can be inhibited by Ca<sup>2+</sup>, no effect was shown in the ADMIDAS mutant. Titrations were done in triplicate.

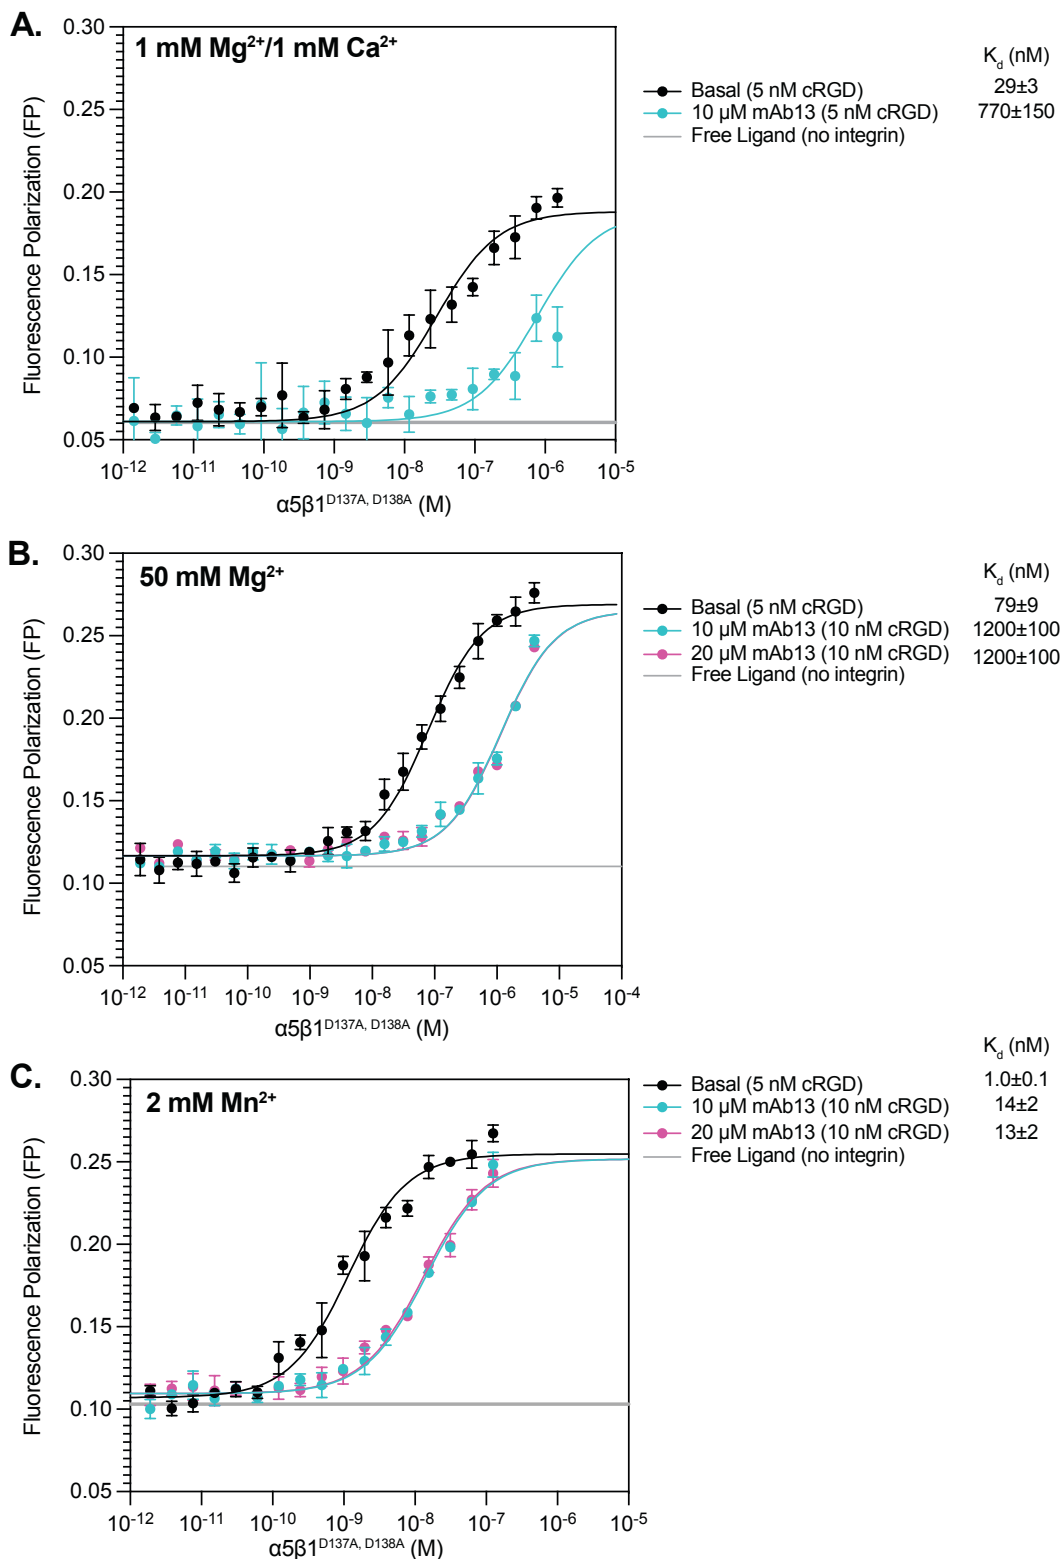

**Figure S5. Basal and closed ensemble affinities of  $\alpha 5 \beta 1^{D137A, D138A}$  for FITC-cRGD.** (A-C) The basal and closed ensemble affinity were determined in 1 mM Mg<sup>2+</sup> / 1 mM Ca<sup>2+</sup> (A), 50 mM Mg<sup>2+</sup> (B), and 2 mM Mn<sup>2+</sup> (C), by titrating  $\alpha 5 \beta 1^{D137A, D138A}$  in the absence and presence of Fab mAb13. In the experiments containing 50 mM Mg<sup>2+</sup> and 2 mM Mn<sup>2+</sup>, titrations were done in two concentrations of mAb13 to ensure full saturation of the closed ensemble. Titrations were done in triplicate and fitted affinities can be found in Table 1. Basal affinities were measured three (A) and five times (B) and averaged.

**Table S1. EC<sub>50</sub>s of Fab titrations  $\alpha 5\beta 1^{WT}$  and  $\alpha 5\beta 1^{D137A, D138A}$  in different metal ion conditions.**

Graphs of the titrations can be found in Figure 3. Concentrations of integrin and ligand can be found in Table S2.

|       |            | $\alpha 5\beta 1^{WT}$                         |                        |                       | $\alpha 5\beta 1^{D137A, D138A}$               |                        |                       |
|-------|------------|------------------------------------------------|------------------------|-----------------------|------------------------------------------------|------------------------|-----------------------|
|       |            | 1 mM Mg <sup>2+</sup><br>1 mM Ca <sup>2+</sup> | 50 mM Mg <sup>2+</sup> | 2 mM Mn <sup>2+</sup> | 1 mM Mg <sup>2+</sup><br>1 mM Ca <sup>2+</sup> | 50 mM Mg <sup>2+</sup> | 2 mM Mn <sup>2+</sup> |
| ••••• | HUTS4 (nM) | 20±3                                           | 8.5±2.0                | -                     | 120±170                                        | 120±120                | 14±6                  |
| ••□•• | 12G10 (nM) | 1.1±0.2                                        | 0.74±0.16              | -                     | 0.065±0.015                                    | 0.80±0.22              | 0.22±0.05             |
| —▲—   | 9EG7 (nM)  | 3.1±1.4                                        | -                      | -                     | -                                              | -                      | -                     |
| —▽—   | 8E3 (nM)   | 8.9±3.8                                        | 6.3±3.3                | -                     | 1.6±1.4                                        | -                      | -                     |
| —◆—   | SG/19 (nM) | 5.1±1.7                                        | 1.5±0.3                | -                     | 14±6                                           | 10±3                   | 3100±450              |
| —○—   | mAb13 (nM) | 2.3±1.1                                        | 3.5±0.4                | -                     | 23±2                                           | 18±3                   | 0.98±0.27             |

Table S2. Concentrations of  $\alpha 5\beta 1$  and ligand used in Fab titrations of  $\alpha 5\beta 1^{WT}$  and  $\alpha 5\beta 1^{D137A, D138A}$  (Figure 3, Table S1).

|                                                                                                | $\alpha 5\beta 1^{WT}$           |                 |                        |                |                        |                | $\alpha 5\beta 1^{D137A, D138A}$ |                 |                         |                |                         |      |
|------------------------------------------------------------------------------------------------|----------------------------------|-----------------|------------------------|----------------|------------------------|----------------|----------------------------------|-----------------|-------------------------|----------------|-------------------------|------|
|                                                                                                | 1 mM $Mg^{2+}$<br>1 mM $Ca^{2+}$ | 50 mM $Mg^{2+}$ | 50 mM $Mg^{2+}$        | 2 mM $Mn^{2+}$ | 2 mM $Mn^{2+}$         | 2 mM $Mn^{2+}$ | 1 mM $Mg^{2+}$<br>1 mM $Ca^{2+}$ | 50 mM $Mg^{2+}$ | 50 mM $Mg^{2+}$         | 2 mM $Mn^{2+}$ | 2 mM $Mn^{2+}$          |      |
|                                                                                                | $\alpha 5\beta 1^{WT}$           | RGD             | $\alpha 5\beta 1^{WT}$ | RGD            | $\alpha 5\beta 1^{WT}$ | RGD            | $\alpha 5\beta 1^{mut}$          | cRGD            | $\alpha 5\beta 1^{mut}$ | cRGD           | $\alpha 5\beta 1^{mut}$ | cRGD |
|  HUTS4 (nM) | 20                               | 5               | 50                     | 5              | 5                      | 5              | 10                               | 10              | 10                      | 10             | 10                      | 10   |
|  12G10 (nM) | 20                               | 5               | 50                     | 5              | 5                      | 5              | 10                               | 10              | 10                      | 10             | 10                      | 10   |
|  9EG7 (nM)  | 20                               | 5               | 50                     | 5              | 5                      | 5              | 50                               | 10              | 50                      | 10             | 10                      | 10   |
|  8E3 (nM)   | 20                               | 5               | 50                     | 5              | 5                      | 5              | 50                               | 10              | 50                      | 10             | 10                      | 10   |
|  SG/19 (nM) | 20                               | 5               | 50                     | 5              | 20                     | 5              | 100                              | 10              | 100                     | 10             | 10                      | 10   |
|  mAb13 (nM) | 20                               | 5               | 50                     | 5              | 20                     | 5              | 100                              | 10              | 100                     | 10             | 10                      | 10   |



**Table S3. Fitted  $K_d$  values for  $\alpha 5\beta 1^{WT}$  and  $\alpha 5\beta 1^{D137A, D138A}$  in the presence and absence of saturating concentrations of Fabs.**  
 Graphs of the titrations can be found in Figure 4, fitted values from panel A can be found in Li et al. {Li, 2017 #24745}.

|   |                        | $\alpha 5\beta 1^{WT}$ |                | $\alpha 5\beta 1^{D137A, D138A}$ |                 |                |
|---|------------------------|------------------------|----------------|----------------------------------|-----------------|----------------|
|   |                        | 50 mM $Mg^{2+}$        | 2 mM $Mn^{2+}$ | 1 mM $Mg^{2+}$<br>1 mM $Ca^{2+}$ | 50 mM $Mg^{2+}$ | 2 mM $Mn^{2+}$ |
| ● | Basal (nM)             | 62±4                   | 2.8±0.3        | 24000±3600                       | 14000±1300      | 580±62         |
| ○ | HUTS4 (nM)             | 26±2                   | 1.5±0.2        | 630±54                           | 730±53          | 51±6           |
| □ | 12G10 (nM)             | -                      | 1.7±0.3        | 170±14                           | 1000±76         | 14±2           |
| ▲ | 9EG7 (nM)              | 53±3                   | 3.3±0.4        | -                                | -               | -              |
| ▼ | 8E3 (nM)               | 54±3                   | 2.2±0.3        | -                                | -               | -              |
| ● | mAb13, 15 $\mu M$ (nM) | 48000±8500             | 3200±130       | -                                | -               | -              |
| ● | mAb13, 30 $\mu M$ (nM) | 51000±9500             | 3500±140       | -                                | -               | -              |
